# Supplementary material for: Identification and Characterization of Genes Related to Ampicillin Antibiotic Resistance in Zymomonas mobilis
Source: MDPI journal article supplement (doi:10.3390/antibiotics11111476), 2022-10-25
Supplement: s1 [file s1]

**Table S3.** Strains used in this study.

| Strains                                                         | Relevant characteristics                                                        | Source     |
|-----------------------------------------------------------------|---------------------------------------------------------------------------------|------------|
| <b>Strains for shuttle plasmids</b>                             |                                                                                 |            |
| DH5 $\alpha$                                                    | <i>E. coli</i> for plasmid construction                                         | Lab stock  |
| <b>Strains for genome-editing based on CRISPR-Cas12a system</b> |                                                                                 |            |
| ZM4                                                             | <i>Z. mobilis</i> subsp. <i>mobilis</i> ZM4 (wild-type strain)                  | Lab stock  |
| ZM4-Cas12a                                                      | The Cas12a expressing cassette with Spe resistance gene replaced <i>ZMO0038</i> | Lab stock  |
| ZM4 $\Delta$ 0103                                               | ZM4 with deletion of <i>ZMO0103</i>                                             | This study |
| ZM4 $\Delta$ 0893                                               | ZM4 with deletion of <i>ZMO0893</i>                                             | This study |
| ZM4 $\Delta$ 1650                                               | ZM4 with deletion of <i>ZMO1650</i>                                             | This study |
| ZM4 $\Delta$ 1866                                               | ZM4 with deletion of <i>ZMO1866</i>                                             | This study |
| ZM4 $\Delta$ ARs                                                | ZM4 with deletions of <i>ZMO0103/0893/1094/1650</i>                             | This study |

**Table S4.** Plasmids used in this study.

| Plasmids                                                         | Relevant characteristics                                                                                                                | Source     |
|------------------------------------------------------------------|-----------------------------------------------------------------------------------------------------------------------------------------|------------|
| <b>Plasmids for genome-editing based on CRISPR-Cas12a system</b> |                                                                                                                                         |            |
| pEZ-sgr-0103                                                     | Plasmid contains an artificial mini-CRISPR cluster based on CRISPR-Cas12a system and targets genome <i>ZMO0103</i> ;<br>Cm <sup>R</sup> | This study |
| pEZ-sgr-0893                                                     | Plasmid contains an artificial mini-CRISPR cluster based on CRISPR-Cas12a system and targets genome <i>ZMO0893</i> ;<br>Cm <sup>R</sup> | This study |
| pEZ-sgr-1094                                                     | Plasmid contains an artificial mini-CRISPR cluster based on CRISPR-Cas12a system and targets genome <i>ZMO1094</i> ;<br>Cm <sup>R</sup> | This study |
| pEZ-sgr-1650                                                     | Plasmid contains an artificial mini-CRISPR cluster based on CRISPR-Cas12a system and targets genome <i>ZMO1650</i> ;<br>Cm <sup>R</sup> | This study |
| pEZ-sgr-1866                                                     | Plasmid contains an artificial mini-CRISPR cluster based on CRISPR-Cas12a system and targets genome <i>ZMO1866</i> ;<br>Cm <sup>R</sup> | This study |
| pEZ-sgr-1967                                                     | Plasmid contains an artificial mini-CRISPR cluster based on CRISPR-Cas12a system and targets genome <i>ZMO1967</i> ;<br>Cm <sup>R</sup> | This study |
| pEZ-sgr-0103-D                                                   | Plasmid contains an artificial mini-CRISPR cluster based on CRISPR-Cas12a system and a donor to target genome                           | This study |

|                |                                                                                                                                                   |            |
|----------------|---------------------------------------------------------------------------------------------------------------------------------------------------|------------|
|                | <i>ZMO0103</i> ; Cm <sup>R</sup>                                                                                                                  |            |
| pEZ-sgr-0893-D | Plasmid contains an artificial mini-CRISPR cluster based on CRISPR-Cas12a system and a donor to target genome<br><i>ZMO0893</i> ; Cm <sup>R</sup> | This study |
| pEZ-sgr-1094-D | Plasmid contains an artificial mini-CRISPR cluster based on CRISPR-Cas12a system and a donor to target genome<br><i>ZMO1094</i> ; Cm <sup>R</sup> | This study |
| pEZ-sgr-1650-D | Plasmid contains an artificial mini-CRISPR cluster based on CRISPR-Cas12a system and a donor to target genome<br><i>ZMO1650</i> ; Cm <sup>R</sup> | This study |
| pEZ-sgr-1866-D | Plasmid contains an artificial mini-CRISPR cluster based on CRISPR-Cas12a system and a donor to target genome<br><i>ZMO1866</i> ; Cm <sup>R</sup> | This study |
| pEZ-sgr-1967-D | Plasmid contains an artificial mini-CRISPR cluster based on CRISPR-Cas12a system and a donor to target genome<br><i>ZMO1967</i> ; Cm <sup>R</sup> | This study |
| pEZ15A         | Shuttle vector contains <i>Z. mobilis</i> origin and <i>E. coli</i> origin 15A; Sp <sup>R</sup>                                                   | Lab stock  |
| pE39-MVA       | Shuttle vector contains <i>Z. mobilis</i> origin, <i>E. coli</i> origin 15A and MVA pathway genes                                                 | Lab stock  |

---

**Table S5.** Primers used in this study.

| Primer names                                                    | Primer sequence (5' to 3')            |
|-----------------------------------------------------------------|---------------------------------------|
| <b>Primers for genome-editing based on CRISPR-Cas12a system</b> |                                       |
| pEZ-SgR-0103-F                                                  | AGATCCGGATCCCAGCCGCTGGTGGTG           |
| pEZ-SgR-0103-R                                                  | TGACCACCACCAGCGGCTGGGATCCGG           |
| pEZ-SgR-0893-F                                                  | AGATTGGGTAAGGCAATCTCTGAAAGT           |
| pEZ-SgR-0893-R                                                  | TGACACTTTCAGAGATTGCCTTACCCA           |
| pEZ-SgR-1094-F                                                  | AGATAACAACATCACGGATGAAATGGC           |
| pEZ-SgR-1094-R                                                  | TGACGCCATTTTCATCCGTGATGTTGTT          |
| pEZ-SgR-1650-F                                                  | AGATCCAATACTTCTTTTGAAGGGATG           |
| pEZ-SgR-1650-R                                                  | TGACCATCCCTTCAAAAGAAGTATTGG           |
| pEZ-SgR-1866-F                                                  | AGATCTTGCACCAGACTGCGCGGAATA           |
| pEZ-SgR-1866-R                                                  | TGACTATTCCGCGCAGTCTGGTGCAAG           |
| 0103-US-F                                                       | GATGCCTGGAGATCCTTACTTCATGGAGCGTCCATCG |
| 0103-US-R                                                       | GGCCTCGCTTTGCCTTTAGACAGTCACAACAAAGGGG |
| 0103-DS-F                                                       | AGGCAAAGCGAGGCCTTTC                   |

---

|           |                                               |
|-----------|-----------------------------------------------|
| 0103-DS-R | TAAATAAGGATCCAAACTCGCGACATATTGGAAACGGTCAG     |
| 0893-US-F | GATGCCTGGAGATCCTTACTCCGAAGATGTGTTCAAATCTGC    |
| 0893-US-R | TTATTCCAAGCGGCATTTTTCTG                       |
| 0893-DS-F | AGAAAAATGCCGCTTGAATAACTGCCTTTAATCTGTTCAGAAGC  |
| 0893-DS-R | TAAATAAGGATCCAAACTCGCAGAACCGCTTCTTCCCC        |
| 1094-US-F | GATGCCTGGAGATCCTTACTAAAGCAGCCAAGGATAAAGC      |
| 1094-US-R | CCCTGCCCCGATTATTGATTTTATCGAACCGAGAAGACGGAG    |
| 1094-DS-F | ATAAAATCAATAATCGGGCAGGGG                      |
| 1094-DS-R | TAAATAAGGATCCAAACTCGATACCCACTAAGGCACCAG       |
| 1650-US-F | GATGCCTGGAGATCCTTACTATCCGCCCCGCCAATATTATG     |
| 1650-US-R | TTATCCAAAGGTTTTGGTGCG                         |
| 1650-DS-F | CGCACCAAAACCTTTGGATAAGGTGCGGTCTTGATTAGCC      |
| 1650-DS-R | TAAATAAGGATCCAAACTCGCAATAACAGCGACGAAACCG      |
| 1866-US-F | GATGCCTGGAGATCCTTACTAACGCGGGCTCATCTTC         |
| 1866-US-R | GCAGATTTTAGCCCCCTGTAAGTGCATGTCTGATTTGGCTTTATC |
| 1866-DS-F | CCTTGCAGCAGGCTTTAG                            |

---

---

|            |                                       |
|------------|---------------------------------------|
| 1866-DS-R  | CTGGCCGGGTTCTAACC                     |
| 0103-out-F | GATTGTCGAACGCGTAACCG                  |
| 0103-out-R | GTCGATCAAGCCGTTGC                     |
| 0893-out-F | ATCAGAGCAAGCCTGACCAC                  |
| 0893-out-R | CCCAATCAGGCTTTGGATGC                  |
| 1094-out-F | GCGTCCTATCTTTCATCGGC                  |
| 1094-out-R | GAATAAAGATGCGGTTAGTTGCAG              |
| 1650-out-F | CTTTTGCCCTGCCCTAACG                   |
| 1650-out-R | CGCTTGAGAACTTCCACCATC                 |
| 1866-out-F | CCTTGCAGCAGGCTTTAG                    |
| 1866-out-R | CTGGCCGGGTTCTAACC                     |
| pEZ15A-F   | GGCAAAGCCACCCTATTTTTAG                |
| pEZ15A-R   | CACTTCACTGACACCCTCAT                  |
| cpf1-kf-F  | CGAGTTTGGATCCTTATTTATACAATTCATCCATACC |
| cpf1-kf-R  | AGTAAGGATCTCCAGGCATCAAATAAAACGA       |

---
