# Supplementary material for: Identification and Characterization of Genes Related to Ampicillin Antibiotic Resistance in Zymomonas mobilis
Source: Antibiotics (Basel). 2022 Oct 25;11(11):1476. doi: 10.3390/antibiotics11111476 (PMC9686808; doi:10.3390/antibiotics11111476)
Supplement: Supplementary file 1 [file antibiotics-11-01476-s001.zip › antibiotics-1936628-supplementary-.xlsx]

## Sheet: Efflux pumps
Table S1. List of the putative efflux pump-type antibiotics resistance genes by BLASTp with CARD and MEGARes databases.
Query acc.ver	Subject acc.ver	Source protein	Identity (%)	Evalue	Bit score	Mechanism
ZMO0079	MEG_3448|Drugs|Aminoglycosides|Aminoglycoside_efflux_pumps|KDPE	CARD|gb|AF155139|+|1511-2207|ARO:3002925|vanRF [Paenibacillus popilliae ATCC 14706]	32.479	2.81e-15	67	Aminoglycoside efflux pumps
ZMO0108	MEG_5852|Multi-compound|Drug_and_biocide_resistance|Drug_and_biocide_SMR_efflux_pumps|QACL	446723218|WP_000800531.1|NG_048049|1|1|qacL|qacL|quaternary_ammonium_compound_efflux_SMR_transporter_QacL NG_048049:101-433	42.169	2.03e-14	62	Drug and biocide SMR efflux pumps
ZMO0111	MEG_4275|Drugs|MLS|MLS_resistance_ABC_efflux_pumps|OLEB	CARD|gb|L36601|+|1420-3130|ARO:3003036|oleB [Streptomyces antibioticus]	38.953	8.69e-16	78.6	MLS resistance ABC efflux pumps
ZMO0143	MEG_7011|Drugs|Tetracyclines|Tetracycline_resistance_MFS_efflux_pumps|TET58	CARD|gb|KX531044.1|+|0-1032|ARO:3003980|tetA(48) [Paenibacillus sp. LC231]	35.443	5.61e-57	186	Tetracycline resistance MFS efflux pumps
ZMO0183	MEG_7802|Drugs|Multi-drug_resistance|Multi-drug_ABC_efflux_pumps|VMLR	CARD|gb|NC_000964.3|-|604735-606379|ARO:3004476|vmlR [Bacillus subtilis subsp. subtilis str. 168]	45.977	2.65e-17	82.8	Multi-drug ABC efflux pumps
ZMO0229	MEG_2893|Metals|Multi-metal_resistance|Multi-metal_ABC_efflux_pumps|FECD	fecD|AAA23764|AAA23764.1Escherichiacolihypotheticalprotein	36.047	3.23e-18	82	Multi-metal ABC efflux pumps
ZMO0230	MEG_2897|Metals|Multi-metal_resistance|Multi-metal_ABC_efflux_pumps|FECE	fecE|AAA97183|AAA97183.1Escherichiacolihypotheticalprotein:Location:1..768	33.945	3.47e-31	114	Multi-metal ABC efflux pumps
ZMO0250	MEG_6524|Multi-compound|Drug_and_biocide_resistance|Drug_and_biocide_RND_efflux_pumps|SME	baeR|ACY89074|ACY89074.1Salmonellaentericasubsp.entericaserovarTyphimuriumstr.14028SDNA-bindingtranscriptionalregulatorBaeR:Location:1..723	32.71	8.01e-11	55.1	Drug and biocide RND efflux pumps
ZMO0254	MEG_7022|Drugs|Tetracyclines|Tetracycline_resistance_MFS_efflux_pumps|TETA	499429506|WP_011116970.1|NG_048317|1|1|tetAB_B|tetAB_B|tetracycline_efflux_ABC_transporter_TetAB_subunit_B NG_048317:101-1687	32.178	1.75e-23	102	Tetracycline resistance MFS efflux pumps
ZMO0257	MEG_5798|Multi-compound|Drug_and_metal_resistance|Drug_and_metal_MFS_efflux_pumps|PMRAM	CARD|gb|AE004091.2|+|5364070-5364736|ARO:3003582|basR [Pseudomonas aeruginosa PAO1]	45.455	1.33e-50	162	Drug and metal MFS efflux pumps
ZMO0260	MEG_7256|Drugs|MLS|MLS_resistance_ABC_efflux_pumps|TLRC	(MLS)TlrC:NC_016113:803268-384890:1623	43.636	1.16e-23	96.3	MLS resistance ABC efflux pumps
ZMO0275	MEG_7011|Drugs|Tetracyclines|Tetracycline_resistance_MFS_efflux_pumps|TET58	CARD|gb|KX531044.1|+|0-1032|ARO:3003980|tetA(48) [Paenibacillus sp. LC231]	34.375	1.85e-35	127	Tetracycline resistance MFS efflux pumps
ZMO0282	MEG_399|Multi-compound|Drug_and_biocide_resistance|Drug_and_biocide_RND_efflux_pumps|ACRA	acrA|AAA67134|AAA67134.1Escherichiacoli42kDaprotein	49.337	2.18e-111	330	Drug and biocide RND efflux pumps
ZMO0283	MEG_3902|Multi-compound|Drug_and_biocide_resistance|Drug_and_biocide_RND_efflux_pumps|MEXB	mexB|AAD45628|AAD45628.1PseudomonasaeruginosapartialmultidrugresistanceproteinMexB:Location:1..384	65.354	1.37e-44	155	Drug and biocide RND efflux pumps
ZMO0285	MEG_2717|Multi-compound|Drug_and_biocide_resistance|Drug_and_biocide_RND_efflux_pumps|EMHC	37519362|AAQ92182.1|AY349612.1|1|1|emhC|emhC|efflux_RND_transporter_outer_membrane_subunit_EmhC AY349612.1:5229-6689	39.112	9.57e-91	284	Drug and biocide RND efflux pumps
ZMO0287	MEG_7788|Biocides|Multi-biocide_resistance|Multi-biocide_RND_efflux_pump|VMEE	vmeE|BAC59203|BAC59203.2VibrioparahaemolyticusRIMD2210633conservedhypotheticalprotein	27.018	7.66e-13	67	Multi-biocide RND efflux pump
ZMO0416	MEG_7810|Metals|Multi-metal_resistance|Multi-metal_ABC_efflux_pumps|WTPC	wtpC|AAL80206|AAL80206.1PyrococcusfuriosusDSM3638membraneprotein	39.474	1.98e-20	86.3	Multi-metal ABC efflux pumps
ZMO0425	MEG_4214|Drugs|Aminocoumarins|Aminocoumarin_efflux_pump|NOVA	CARD|gb|AF170880|+|0-1848|ARO:3002522|novA [Streptomyces niveus]	30.396	3.3e-12	63.9	Aminocoumarin efflux pump
ZMO0458	MEG_3658|Drugs|Multi-drug_resistance|Multi-drug_ABC_efflux_pumps|MACB	CARD|gb|AY768532|+|0-1935|ARO:3000535|macB [Neisseria gonorrhoeae]	36.771	5.83e-47	162	Multi-drug ABC efflux pumps
ZMO0478	MEG_6506|Metals|Multi-metal_resistance|Multi-metal_RND_efflux_pumps|SILP	ADD73560|ADD73560.1Achromobactersp.AO22two-componentheavymetalresponseregulator:Location:1..693	33.186	2.66e-28	105	Multi-metal RND efflux pumps
ZMO0480	MEG_6525|Multi-compound|Drug_and_biocide_resistance|Drug_and_biocide_RND_efflux_pumps|SME	copS|ACL13562|ACL13562.1PseudomonasfluorescensCopS	22.174	1.24e-13	72	Drug and biocide RND efflux pumps
ZMO0494	MEG_1775|Drugs|Phenicol|Phenicol_resistance_MFS_efflux_pumps|CMLB	CARD|gb|AM296481|+|775-2041|ARO:3002699|cmlB1 [Bordetella bronchiseptica]	34.555	2.92e-14	72	Phenicol resistance MFS efflux pumps
ZMO0515	MEG_7055|Drugs|Tetracyclines|Tetracycline_resistance_MFS_efflux_pumps|TETBP	CARD|gb|BX571856|+|599702-601784|ARO:3003735|Staphylococcus mutant fusA gene conferring resistance to fusidic acid [Staphylococcus aureus subsp. aureus MRSA252]	26.51	1.74e-76	256	Tetracycline resistance MFS efflux pumps
ZMO0516	MEG_7055|Drugs|Tetracyclines|Tetracycline_resistance_MFS_efflux_pumps|TETBP	gi|225791049|gb|CP000675.2|435626-436816	33.094	2.02e-17	82	Tetracycline resistance MFS efflux pumps
ZMO0572	MEG_2891|Metals|Multi-metal_resistance|Multi-metal_ABC_efflux_pumps|FBPC	fbpC|AAB32112|AAB32112.1HaemophilusinfluenzaeHitC	36.986	7.15e-35	130	Multi-metal ABC efflux pumps
ZMO0697	MEG_6578|Biocides|Multi-biocide_resistance|Multi-biocide_SMR_efflux_pump|SUGE	sugE|CAA49571|CAA49571.1EscherichiacoliSugES:Location:1..318	50.476	1.92e-27	95.1	Multi-biocide SMR efflux pump
ZMO0743	MEG_7055|Drugs|Tetracyclines|Tetracycline_resistance_MFS_efflux_pumps|TETBP	CARD|gb|X53401|+|0-1992|ARO:3002891|otr(A) [Streptomyces rimosus]	27.7	2.4e-41	155	Tetracycline resistance MFS efflux pumps
ZMO0778	MEG_4083|Multi-compound|Drug_and_biocide_resistance|Drug_and_biocide_RND_efflux_pumps|MTRD	gi|744797373|gb|CP006869.1|1796025-1799228 gi|325199235|gb|CP002420.1|536083-539286 gi|66731897|gb|AE002098.2|1795170-1791967	31.667	4.7e-13	71.6	Drug and biocide RND efflux pumps
ZMO0779	MEG_3938|Multi-compound|Drug_and_biocide_resistance|Drug_and_biocide_RND_efflux_pumps|MEXX	gi|926451317|emb|LN871187.1|3303327-3304517 gi|553895034|gb|CP006832.1|2212507-2211317 gi|553886202|gb|CP006831.1|2212507-2211317 gi|110227054|gb|AE004091.2|2212512-2211322 gi|6502949|gb|AF147719.1|AF147719|1020-2210	27.778	1.14e-12	67	Drug and biocide RND efflux pumps
ZMO0780	MEG_4292|Drugs|Multi-drug_resistance|Multi-drug_RND_efflux_pumps|OPMB	CARD|gb|AE004091.2|-|2846282-2847779|ARO:3004072|OpmB [Pseudomonas aeruginosa PAO1]	39.744	8.81e-89	278	Multi-drug RND efflux pumps
ZMO0798	MEG_4291|Drugs|Multi-drug_resistance|Multi-drug_RND_efflux_pumps|OPCM	CARD|gb|U38944.1|+|0-1536|ARO:3003037|opcM [Burkholderia cepacia]	28.095	1.78e-20	92	Multi-drug RND efflux pumps
ZMO0800	MEG_7011|Drugs|Tetracyclines|Tetracycline_resistance_MFS_efflux_pumps|TET58	CARD|gb|KX531044.1|+|0-1032|ARO:3003980|tetA(48) [Paenibacillus sp. LC231]	37.551	1.81e-41	153	Tetracycline resistance MFS efflux pumps
ZMO0910	MEG_2891|Metals|Multi-metal_resistance|Multi-metal_ABC_efflux_pumps|FBPC	fbpC|AAB32112|AAB32112.1HaemophilusinfluenzaeHitC	28.889	8.77e-16	72.8	Multi-metal ABC efflux pumps
ZMO0915	MEG_6507|Metals|Multi-metal_resistance|Multi-metal_RND_efflux_pumps|SILP	copA|AFM70729|AFM70729.1EnterococcushiraeATCC9790copper-translocatingP-typeATPase	43.607	7.28e-146	445	Multi-metal RND efflux pumps
ZMO0963	MEG_4109|Drugs|Multi-drug_resistance|Multi-drug_RND_efflux_pumps|NALC|RequiresSNPConfirmation	CARD|gb|AE004091.2|+|4166517-4167159|ARO:3000818|nalC [Pseudomonas aeruginosa PAO1]	38.235	2.83e-29	106	Multi-drug RND efflux pumps
ZMO0964	MEG_7639|Multi-compound|Drug_and_biocide_resistance|Drug_and_biocide_RND_efflux_pumps|VCEC	vceC|AAF94566|AAF94566.1VibriocholeraeO1biovarElTorstr.N16961multidrugresistanceprotein,putative	38.737	4.05e-83	263	Drug and biocide RND efflux pumps
ZMO0965	MEG_7637|Multi-compound|Drug_and_biocide_resistance|Drug_and_biocide_RND_efflux_pumps|VCEA	vceA|AAC38085|AAC38085.1VibriocholeraeVceA	50	3.72e-73	232	Drug and biocide RND efflux pumps
ZMO0966	MEG_7638|Multi-compound|Drug_and_biocide_resistance|Drug_and_biocide_RND_efflux_pumps|VCEB	vceB|AAC38086|AAC38086.1VibriocholeraeVceB	49.802	9.27e-162	468	Drug and biocide RND efflux pumps
ZMO0981	MEG_4173|Metals|Nickel_resistance|Nickel_ABC_efflux_pumps|NIKE	nikE|AAB18455|AAB18455.1Escherichiacolihypotheticalprotein:Location:1..807	38.813	2.97e-39	142	Nickel ABC efflux pumps
ZMO0982	MEG_4170|Metals|Nickel_resistance|Nickel_ABC_efflux_pumps|NIKC	nikC|CAA51661|CAA51661.1EscherichiacoliNikC:Location:1..834	30.472	2.63e-21	88.6	Nickel ABC efflux pumps
ZMO0983	MEG_4167|Metals|Nickel_resistance|Nickel_ABC_efflux_pumps|NIKA	nikA|CAA51659|CAA51659.1EscherichiacoliNikA	34.237	9.31e-36	140	Nickel ABC efflux pumps
ZMO1017	MEG_4174|Metals|Nickel_resistance|Nickel_ABC_efflux_pumps|NIKE	nikE|CAA51663|CAA51663.1EscherichiacoliNikE:Location:1..807	35.323	2.33e-13	66.2	Nickel ABC efflux pumps
ZMO1029	MEG_4383|Drugs|Tetracyclines|Tetracycline_resistance_ABC_efflux_pumps|OTRC	CARD|gb|AY509111|+|0-1056|ARO:3002894|otrC [Streptomyces rimosus]	39.56	4.84e-16	75.5	Tetracycline resistance ABC efflux pumps
ZMO1050	MEG_4011|Metals|Multi-metal_resistance|Multi-metal_ABC_efflux_pumps|MODC	pstB|CAA26509|CAA26509.1Escherichiacolihypotheticalprotein:Location:1..774	33.333	1.28e-12	64.3	Multi-metal ABC efflux pumps
ZMO1162	MEG_6525|Multi-compound|Drug_and_biocide_resistance|Drug_and_biocide_RND_efflux_pumps|SME	CARD|gb|BX571856|+|25616-27443|ARO:3003794|Staphylococcus aureus walK with mutation conferring daptomycin resistance [Staphylococcus aureus subsp. aureus MRSA252]	32.609	4.99e-25	104	Drug and biocide RND efflux pumps
ZMO1164	MEG_6524|Multi-compound|Drug_and_biocide_resistance|Drug_and_biocide_RND_efflux_pumps|SME	gi|984994143|gb|CP010340.1|3644231-3643545 gi|984989958|gb|CP010339.1|3626563-3625877 gi|984985728|gb|CP010338.1|3617932-3617246 gi|984981517|gb|CP010337.1|3634956-3634270 gi|984976917|gb|CP010336.1|3612763-3612077 gi|984972452|gb|CP010335.1|3622429-3621743 gi|984967653|gb|CP010334.1|3603816-3603130 gi|984963331|gb|CP010333.1|3618149-3617463 gi|984959134|gb|CP010332.1|3578123-3577437 gi|984950177…	41.667	7e-32	114	Drug and biocide RND efflux pumps
ZMO1176	MEG_6525|Multi-compound|Drug_and_biocide_resistance|Drug_and_biocide_RND_efflux_pumps|SME	gi|985000614|gb|CP014225.1|2302175-2300802 gi|939732440|gb|CP011343.2|4085734-4084361 gi|939731527|gb|CP011342.2|4086500-4085127 gi|937526251|gb|CP012870.1|536680-538053 gi|937521852|gb|CP012869.1|536680-538053 gi|937517453|gb|CP012868.1|536680-538053 gi|932857508|emb|LN877770.1|4927738-4926365 gi|923416119|gb|CP011113.1|4061702-4060329 gi|899729770|gb|CP012127.1|4079382-4078009 gi|899725419|gb|C…	28.112	8.71e-19	86.7	Drug and biocide RND efflux pumps
ZMO1177	MEG_6524|Multi-compound|Drug_and_biocide_resistance|Drug_and_biocide_RND_efflux_pumps|SME	gi|119668705|emb|AM406670.1|3025977-3026735	37.069	7.97e-30	109	Drug and biocide RND efflux pumps
ZMO1196	MEG_6539|Biocides|Multi-biocide_resistance|Multi-biocide_MFS_efflux_pump|SMVA	smvA/emrB|ACY88371|ACY88371.1Salmonellaentericasubsp.entericaserovarTyphimuriumstr.14028Smethylviologenresistance	29.373	2.21e-20	91.7	Multi-biocide MFS efflux pump
ZMO1263	MEG_3658|Drugs|Multi-drug_resistance|Multi-drug_ABC_efflux_pumps|MACB	CARD|gb|AY768532|+|0-1935|ARO:3000535|macB [Neisseria gonorrhoeae]	37.662	3.8e-34	127	Multi-drug ABC efflux pumps
ZMO1322	MEG_6524|Multi-compound|Drug_and_biocide_resistance|Drug_and_biocide_RND_efflux_pumps|SME	gi|985000614|gb|CP014225.1|2302870-2302172 gi|984297099|gb|CP014197.1|4477427-4478125 gi|975003027|gb|CP010829.1|4321600-4320902 gi|958627747|gb|CP013253.1|3897459-3898157 gi|939732440|gb|CP011343.2|4086429-4085731 gi|939731527|gb|CP011342.2|4087195-4086497 gi|937526251|gb|CP012870.1|535985-536683 gi|937521852|gb|CP012869.1|535985-536683 gi|937517453|gb|CP012868.1|535985-536683 gi|932857508|emb|L…	33.766	9.6e-40	135	Drug and biocide RND efflux pumps
ZMO1323	MEG_6525|Multi-compound|Drug_and_biocide_resistance|Drug_and_biocide_RND_efflux_pumps|SME	copS|AAA25804|AAA25804.1Pseudomonassyringaetranscriptionalactivator	31.641	2.46e-25	107	Drug and biocide RND efflux pumps
ZMO1355	MEG_4067|Drugs|MLS|MLS_resistance_ABC_efflux_pumps|MSRA	(MLS)MsrA:AY591760:274-1740:1467	34.091	2.65e-16	79.7	MLS resistance ABC efflux pumps
ZMO1387	MEG_5798|Multi-compound|Drug_and_metal_resistance|Drug_and_metal_MFS_efflux_pumps|PMRAM	gi|984671414|emb|LT009690.1|1469141-1468482 gi|974161314|gb|CP012018.1|1533436-1532777 gi|974158397|gb|CP012015.1|1534172-1533513 gi|974155539|gb|CP012013.1|1535085-1534426 gi|974152716|gb|CP012012.1|1526966-1526307 gi|974149849|gb|CP012011.1|1582920-1582261 gi|941146344|gb|CP007676.1|1426316-1425657 gi|941142962|gb|CP007672.1|1424705-1424046 gi|941139768|gb|CP007657.1|1438417-1437758 gi|93058489…	33.628	4.69e-39	132	Drug and metal MFS efflux pumps
ZMO1429	MEG_4299|Biocides|Multi-biocide_resistance|Multi-biocide_RND_efflux_pump|OPRM	oprM/oprK|AAA74438|AAA74438.1Pseudomonasaeruginosapartialoutermembraneprotein	28.667	2e-16	78.2	Multi-biocide RND efflux pump
ZMO1430	MEG_3763|Multi-compound|Drug_and_biocide_resistance|Drug_and_biocide_RND_efflux_pumps|MDTN	mdtN/yjcR|AAC43176|AAC43176.1Escherichiacolistr.K-12substr.MG1655ORF_f343	31.361	7.13e-16	75.9	Drug and biocide RND efflux pumps
ZMO1452	MEG_2614|Drugs|Phenicol|Phenicol_resistance_MFS_efflux_pumps|DHAP	(Phe)Dha1:BA000018:2517801-2518988:1188	32.727	1.49e-23	99.4	Phenicol resistance MFS efflux pumps
ZMO1471	MEG_7055|Drugs|Tetracyclines|Tetracycline_resistance_MFS_efflux_pumps|TETBP	gi|499664|gb|L33696.1|PVOTETQ|825-2750	30.588	2.63e-29	120	Tetracycline resistance MFS efflux pumps
ZMO1512	MEG_3597|Drugs|Multi-drug_resistance|Multi-drug_ABC_efflux_pumps|LMRD	ybtQ|AAC69584|AAC69584.1YersiniapestisYbtQ	45.228	4.39e-64	220	Multi-drug ABC efflux pumps
ZMO1525	MEG_4292|Drugs|Multi-drug_resistance|Multi-drug_RND_efflux_pumps|OPMB	CARD|gb|AE004091.2|-|2846282-2847779|ARO:3004072|OpmB [Pseudomonas aeruginosa PAO1]	38.085	1.09e-87	289	Multi-drug RND efflux pumps
ZMO1527	MEG_3749|Multi-compound|Drug_and_biocide_and_metal_resistance|Drug_and_biocide_and_metal_RND_efflux_pumps|MDTC	mdtC/yegO|BAC06609|BAC06609.1Escherichiacolimultidrugtransporter	56.356	6.82e-69	248	Drug and biocide and metal RND efflux pumps
ZMO1528	MEG_3747|Multi-compound|Drug_and_biocide_and_metal_resistance|Drug_and_biocide_and_metal_RND_efflux_pumps|MDTB	mdtB/yegN|BAC06608|BAC06608.1Escherichiacolimultidrugtransporter	55.739	0	954	Drug and biocide and metal RND efflux pumps
ZMO1529	MEG_4100|Drugs|Multi-drug_resistance|Multi-drug_RND_efflux_pumps|MUXA	CARD|gb|AE004091.2|-|2854010-2855291|ARO:3004073|MuxA [Pseudomonas aeruginosa PAO1]	44.477	1.22e-94	290	Multi-drug RND efflux pumps
ZMO1577	MEG_1785|Drugs|Phenicol|Phenicol_resistance_MFS_efflux_pumps|CMX	CARD|gb|U09991|+|27-1338|ARO:3002700|cmlv [Streptomyces venezuelae ATCC 10712]	27.899	2.5e-18	84	Phenicol resistance MFS efflux pumps
ZMO1590	MEG_7325|Metals|Tungsten_Resistance|Tungsten_ABC_efflux_pumps|TUPC	pstB|CAA26509|CAA26509.1Escherichiacolihypotheticalprotein:Location:1..774	33.945	1.58e-23	92.8	Tungsten ABC efflux pumps
ZMO1741	MEG_7055|Drugs|Tetracyclines|Tetracycline_resistance_MFS_efflux_pumps|TETBP	488999204|WP_002909882.1|NG_048263|1|1|tet(O)|tet(O)|tetracycline_resistance_ribosomal_protection_protein_Tet(O) NG_048263:101-2020	33.553	2.34e-21	96.3	Tetracycline resistance MFS efflux pumps
ZMO1790	MEG_6535|Biocides|Multi-biocide_resistance|Multi-biocide_ABC_efflux_pump|SMRA	smrA|ACR15109|ACR15109.1StenotrophomonasmaltophiliapartialABC-typemultidrugeffluxpump	48.971	1.42e-49	179	Multi-biocide ABC efflux pump
ZMO1846	MEG_2897|Metals|Multi-metal_resistance|Multi-metal_ABC_efflux_pumps|FECE	yfeB|AAC46148|AAC46148.1YersiniapestisYfeB:Location:1..891	36.402	2.39e-49	160	Multi-metal ABC efflux pumps
ZMO1847	MEG_2893|Metals|Multi-metal_resistance|Multi-metal_ABC_efflux_pumps|FECD	fecD|AAA23764|AAA23764.1Escherichiacolihypotheticalprotein	33.808	4.72e-32	120	Multi-metal ABC efflux pumps
ZMO1962	MEG_6525|Multi-compound|Drug_and_biocide_resistance|Drug_and_biocide_RND_efflux_pumps|SME	1028100609|WP_063856744.1|NG_048444|1|1|vanS-D|vanS-D|VanD-type_vancomycin_resistance_histidine_kinase_VanS NG_048444:101-1246	28.814	1.74e-12	67	Drug and biocide RND efflux pumps
ZMO1977	MEG_6649|Drugs|Tetracenomycin|Tetracenomycin_MFS_efflux_pump|TCMA	918359733|WP_052413892.1|NG_048121|1|1|tcmA|tcmA|tetracenomycin_C_efflux_MFS_transporter NG_048121:101-1717	34.328	7.75e-24	102	Tetracenomycin MFS efflux pump
ZMO2018	MEG_3829|Drugs|MLS|MLS_resistance_MFS_efflux_pumps|MEFE	CARD|gb|AE007317.1|+|953382-954594|ARO:3000614|mefE [Streptococcus pneumoniae R6]	25.49	3.59e-12	65.5	MLS resistance MFS efflux pumps
ZMOp33x020	MEG_1212|Multi-compound|Drug_and_biocide_resistance|Drug_and_biocide_MFS_efflux_pumps|BCR1	CARD|gb|CP012901.1|-|5979156-5980365|ARO:3003801|bcr-1 [Pseudomonas aeruginosa]	41.049	2e-60	199	Drug and biocide MFS efflux pumps
ZMOp39x013	MEG_6535|Biocides|Multi-biocide_resistance|Multi-biocide_ABC_efflux_pump|SMRA	smrA|ACR15109|ACR15109.1StenotrophomonasmaltophiliapartialABC-typemultidrugeffluxpump	40.873	4.34e-45	167	Multi-biocide ABC efflux pump
ZMOp39x014	MEG_7635|Biocides|Multi-biocide_resistance|Multi-biocide_ABC_efflux_pump|VCAM	vcaM|AAF96892|AAF96892.1VibriocholeraeO1biovarElTorstr.N16961ABCtransporter,ATP-bindingprotein	44.094	1.09e-53	191	Multi-biocide ABC efflux pump
ZMOp39x015	MEG_7011|Drugs|Tetracyclines|Tetracycline_resistance_MFS_efflux_pumps|TET58	CARD|gb|KX531044.1|+|0-1032|ARO:3003980|tetA(48) [Paenibacillus sp. LC231]	39.234	1.62e-39	139	Tetracycline resistance MFS efflux pumps

## Sheet: Uniprot_Lacatamase
Table S2. List of the putative β-lactamase genes by BLASTp in the Uniprot database.
query acc.ver	subject acc.ver	% identity	evalue	bit score
ZMO0888	sp|P19241|BINR_STAAU	53.005	8.69e-61	183
ZMO0697	sp|Q799A3|GDX_KLEOX	52.381	1.65e-36	115
ZMO0783	sp|Q49091|GATA_MORCA	50.61	1.57e-148	429
ZMO0777	sp|P75849|GLO22_ECOLI	48.585	6.38e-75	221
ZMO0759	sp|Q60BX0|GLO2_METCA	48.221	9.09e-94	271
ZMO0782	sp|Q49092|GATB_MORCA	47.619	2.27e-167	478
ZMO1650	sp|Q9KX40|ESTB_BURGA	45.646	3.6e-111	326
ZMO1549	sp|P0ABE2|BOLA_ECOLI	42.667	5.24e-13	55.5
ZMO1866	sp|M4MR97|RNJ_SINM2	42.105	3.74e-150	438
ZMO1455	sp|P18358|BINL_STAAU	41.176	1.53e-47	150
ZMO0661	sp|P9WNV7|DNAJ2_MYCTU	40.47	1.61e-79	244
ZMO1870	sp|P30011|NADC_ECOLI	40.357	1.28e-50	166
ZMO0675	sp|P52658|AMPR_CITKO	40	3.32e-33	118
ZMO0998	sp|P86890|MSRAB_ENTFL	39.735	3.86e-37	126
ZMO0825	sp|B8H0A0|FTSI_CAUVN	39.053	1.04e-105	325
ZMO0029	sp|Q9ZKB5|HCPC_HELPJ	38.728	9.04e-29	111
ZMO0283	sp|P30906|YCBL_BACUN	38.298	3.39e-16	72.8
ZMO0050	sp|P52683|SMER_SERMA	37.008	9.64e-13	62.8
ZMO1571	sp|P0ABJ9|CYDA_ECOLI	36.508	2.38e-61	204
ZMO0592	sp|P0ADR2|YGDD_ECOLI	36.283	2.98e-16	65.5
ZMO1603	sp|Q9PFB0|BLH_XYLFA	35.659	2.04e-22	87
ZMO0581	sp|P0AE16|AMPG_ECOLI	35.219	5.1e-68	220
ZMO0137	sp|O25728|HCPC_HELPY	35.16	1.68e-40	141
ZMO0781	sp|P52676|NMCR_ENTCL	34.783	7.26e-21	86.3
ZMO1967	sp|P30897|BLAC_PROMI	34.722	9.23e-59	186
ZMO0197	sp|P02919|PBPB_ECOLI	33.588	4.58e-30	122
ZMO1089	sp|P0AEB2|DACA_ECOLI	33.239	1.18e-56	186
ZMO0959	sp|P02919|PBPB_ECOLI	33.077	6.58e-18	77.8
ZMO1690	sp|P9WNV7|DNAJ2_MYCTU	32.927	6.2e-19	81.6
ZMO0135	sp|Q9ZKB5|HCPC_HELPJ	32.919	5.47e-24	92.8
ZMO1149	sp|P0AEH1|RSEP_ECOLI	32.906	4.71e-29	112
ZMO0133	sp|O25728|HCPC_HELPY	32.828	1.48e-28	105
ZMO0598	sp|P62590|INT2_ECOLX	32.719	1.24e-16	74.3
ZMO0136	sp|Q9ZKB5|HCPC_HELPJ	32.704	1.83e-17	75.1
ZMO0784	sp|P58528|GATC_MORCA	32.584	5.32e-11	50.1
ZMO1095	sp|P33653|YBL1_STRCI	32.287	1.2e-27	102
ZMO1196	sp|Q04733|CMCT_AMYLA	32.195	8.65e-17	77.8
ZMOp33x015	sp|Q49091|GATA_MORCA	31.535	1.68e-44	157
ZMO2041	sp|O25728|HCPC_HELPY	31.222	6.72e-30	109
ZMO0026	sp|O25728|HCPC_HELPY	31.148	2.35e-31	114
ZMO1171	sp|Q8ZQ06|NAGZ_SALTY	30.99	7.76e-38	134
ZMO1223	sp|A0A1B4XBH3|SDNO_SORAA	30.903	4.66e-20	86.3
ZMO0499	sp|P02919-2|PBPB_ECOLI	30.642	6.27e-61	214
ZMO0132	sp|O25728|HCPC_HELPY	30.481	3.57e-22	88.6
ZMO2040	sp|Q9ZMJ9|HCPE_HELPJ	30.38	6.43e-29	111
ZMO0068	sp|O25728|HCPC_HELPY	30.18	2.94e-32	118
ZMO0941	sp|A0A1B4XBH2|SDNI_SORAA	29.814	4.08e-13	65.1
ZMO1574	sp|P14145|AMPR_RHOCA	29.804	2.27e-23	92.8
ZMO0893	sp|O05213|AMIE_BACSU	29.513	2.09e-26	104
ZMO1772	sp|A0A1B4XBH3|SDNO_SORAA	29.442	2.57e-13	66.6
ZMO0687	sp|Q9LCV9|CEAS_STRCL	29.087	2.26e-54	188
ZMO1336	sp|P12529|AMPR_CITFR	29.07	2.09e-16	73.2
ZMO1914	sp|P62590|INT2_ECOLX	29.022	1.15e-19	83.2
ZMO0134	sp|O25728|HCPC_HELPY	28.188	3.13e-14	63.9
ZMO1572	sp|P0ABK2|CYDB_ECOLI	27.838	3.35e-39	138
ZMO0044	sp|O25728|HCPC_HELPY	27.35	1.8e-26	104
ZMO1006	sp|P0C002|DHP1_ECOLX	27.341	7.2e-22	89.4
ZMO1969	sp|O25728|HCPC_HELPY	27.273	3.33e-31	114
ZMO0471	sp|P52660|BLAA_PROVU	27.027	3.25e-17	75.9
ZMOp33x019	sp|P0A9F6|GCVA_ECOLI	26.937	7.82e-14	65.9
ZMO1278	sp|A0A1B4XBH3|SDNO_SORAA	26.855	1.95e-23	98.6
ZMO1139	sp|Q9LCV9|CEAS_STRCL	26.527	3.17e-42	155
ZMO0564	sp|A0A1B4XBK0|SDNC_SORAA	25.63	5.23e-16	73.9
ZMO0966	sp|Q04733|CMCT_AMYLA	25.277	1.52e-18	83.6
ZMO0774	sp|P0A9F6|GCVA_ECOLI	25.256	5.78e-23	91.7
ZMO0103	sp|Q6GDZ1|FLP_STAAR	24.107	8.23e-18	81.3
ZMO0359	sp|Q07868|PBP2B_BACSU	23.711	4.65e-23	99
ZMO1113	sp|A0A067XMP1|PTAL_PESFW	22.857	1.02e-11	61.2
